# Supplementary material
Source: MDPI journal article supplement (https://www.mdpi.com/2227-9717/11/6/1705)
Supplement: s1 [file s1]

# Supplementary Material: Evaluation of a resorcinarene-based sorbent as a solid-phase extraction material for the enrichment of L-carnitine from aqueous solutions

María Moreno, Alver Castillo-Aguirre and Mauricio Maldonado

Table of Contents:

**Figure S1.** FT-IR spectrum of compound 1

**Figure S2.**  $^1\text{H}$ -NMR spectrum (400 MHz,  $\text{DMSO-}d_6$ , 293 K) of compound 1

**Figure S3.**  $^{13}\text{C}$ -NMR spectrum (400 MHz,  $\text{DMSO-}d_6$ , 293 K) of compound 1

**Figure S4.** MS spectrum of compound 1

**Figure S5.** FT-IR spectrum of compound 2

**Figure S6.**  $^1\text{H}$ -NMR spectrum (400 MHz,  $\text{DMSO-}d_6$ , 293 K) of compound 2

**Figure S7.**  $^{13}\text{C}$ -NMR spectrum (400 MHz,  $\text{DMSO-}d_6$ , 293 K) of compound 2

**Figure S8.** MS spectrum of compound 2

**Figure S9.** FT-IR spectrum of compound 3

**Figure S10.**  $^1\text{H}$ -NMR spectrum (400 MHz,  $\text{DMSO-}d_6$ , 293 K) of compound 3

**Figure S11.**  $^{13}\text{C}$ -NMR spectrum (400 MHz,  $\text{DMSO-}d_6$ , 293 K) of compound 3

**Figure S12.** MS spectrum of compound 3

**Figure S13.** FT-IR spectrum of compound 4

**Figure S14.**  $^1\text{H}$ -NMR spectrum (400 MHz,  $\text{DMSO-}d_6$ , 293 K) of compound 4

**Figure S15.**  $^{13}\text{C}$ -NMR spectrum (400 MHz,  $\text{DMSO-}d_6$ , 293 K) of compound 4

**Figure S16.** FT-IR spectrum of compound 5

**Figure S17.**  $^1\text{H}$ -NMR spectrum (400 MHz,  $\text{DMSO-}d_6$ , 293 K) of compound 5

**Figure S18.**  $^{13}\text{C}$ -NMR spectrum (400 MHz,  $\text{DMSO-}d_6$ , 293 K) of compound 5

**Figure S19.**  $^1\text{H}$ -NMR spectrum (400 MHz,  $\text{DMSO-}d_6$ , 293 K) of complex 1

**Figure S20.** MS spectrum of complex 1

**Figure S21.**  $^1\text{H}$ -NMR spectrum (400 MHz,  $\text{DMSO-}d_6$ , 293 K) of complex 2

**Figure S22.** MS spectrum of complex 2

**Figure S23.**  $^1\text{H}$ -NMR spectrum (400 MHz,  $\text{DMSO-}d_6$ , 293 K) of complex 3

**Figure S24.** MS spectrum of complex 3

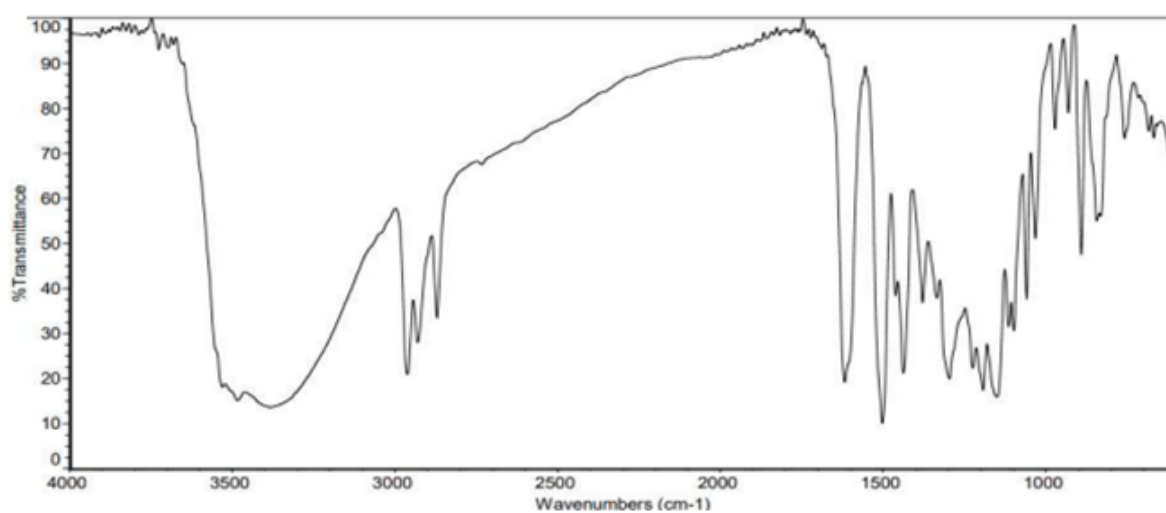

**Figure S1.** FT-IR spectrum of compound 1

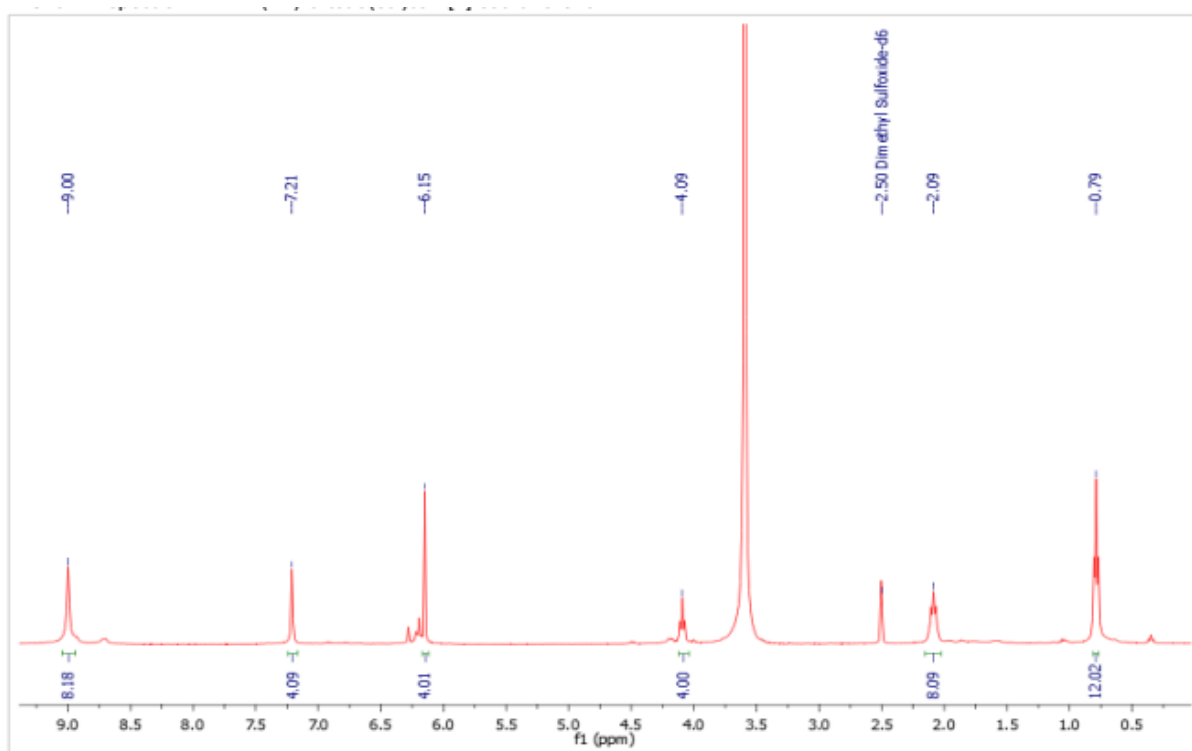

**Figure S2.** <sup>1</sup>H-NMR spectrum (400 MHz, DMSO-*d*<sub>6</sub>, 293 K) of compound **1**

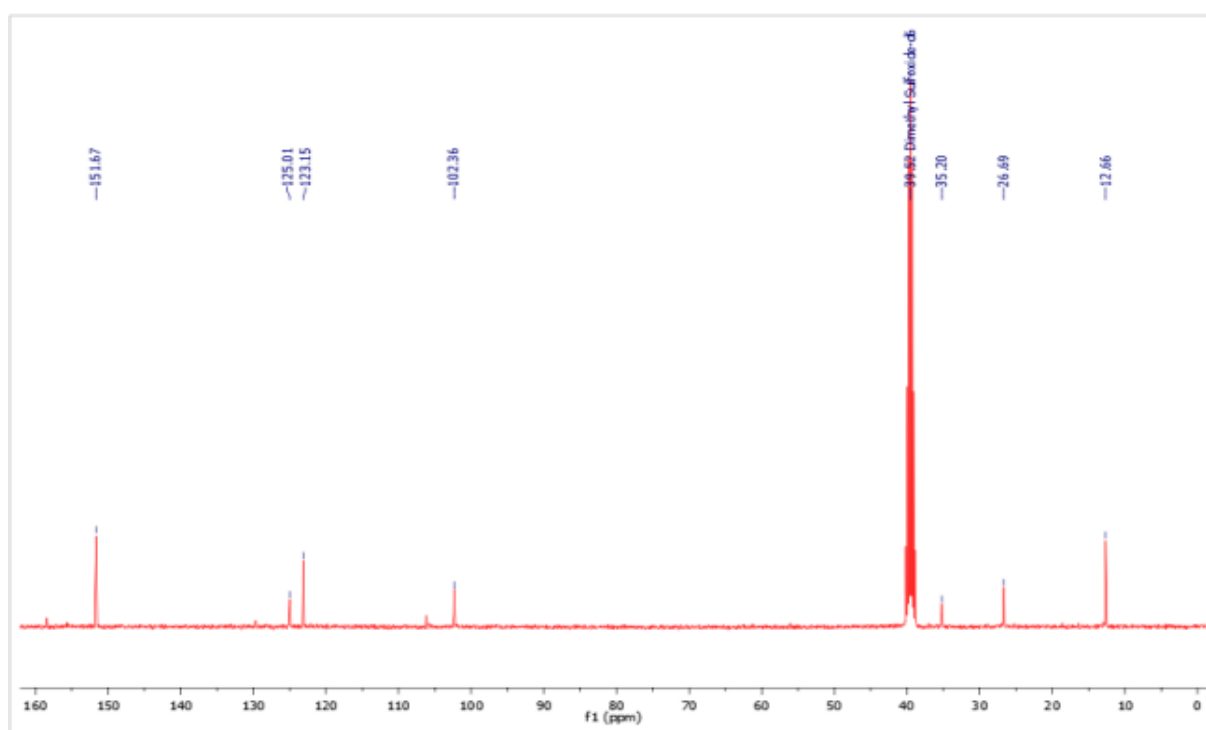

**Figure S3.** <sup>13</sup>C-NMR spectrum (400 MHz, DMSO-*d*<sub>6</sub>, 293 K) of compound **1**

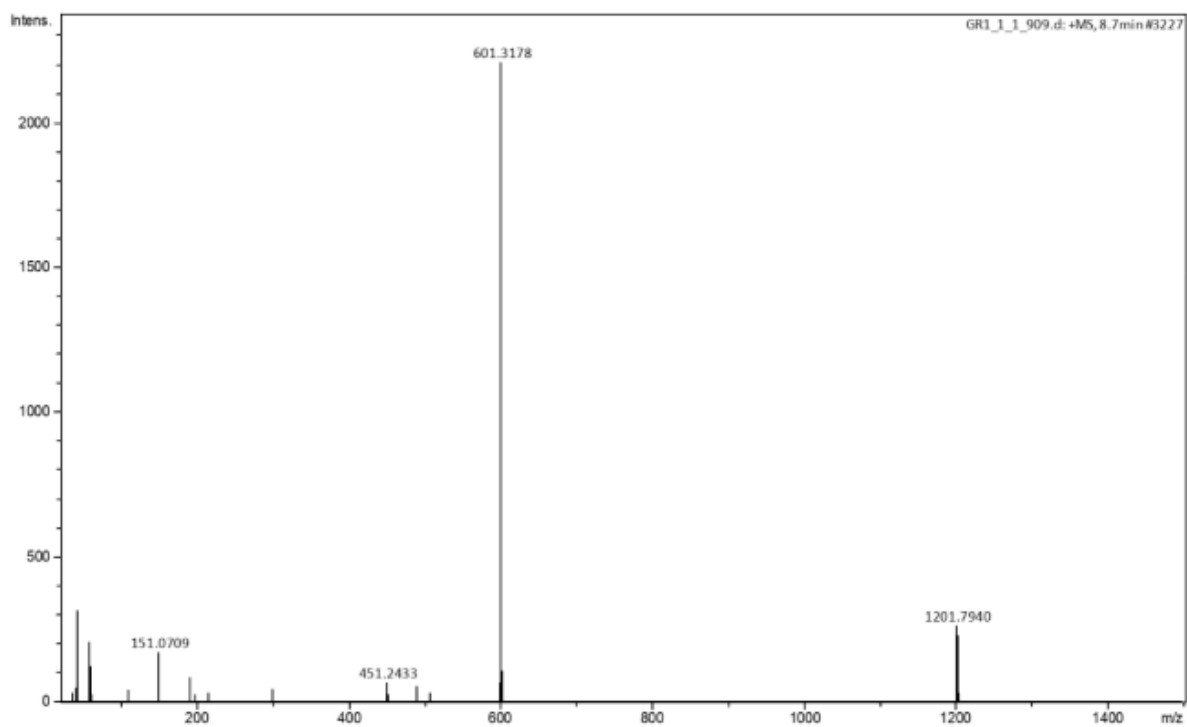

Figure S4. MS spectrum of compound 1

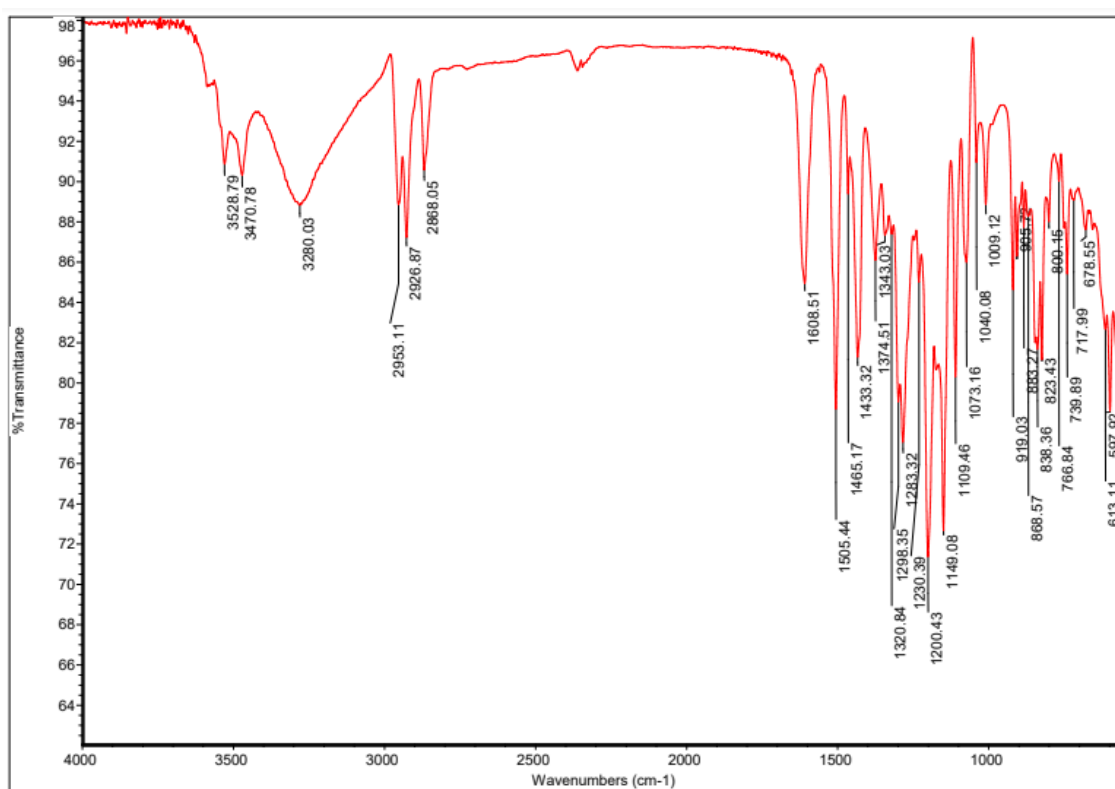

Figure S5. FT-IR spectrum of compound 2

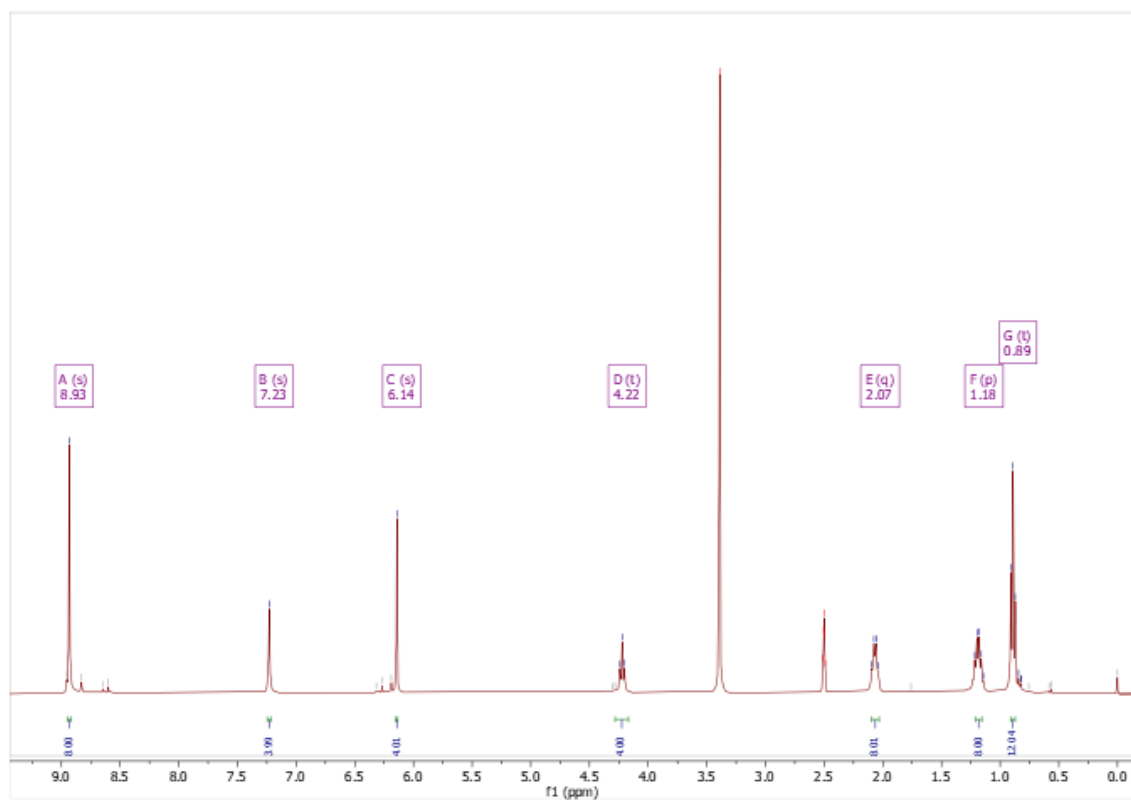

**Figure S6.**  $^1\text{H}$ -NMR spectrum (400 MHz,  $\text{DMSO}-d_6$ , 293 K) of compound **2**

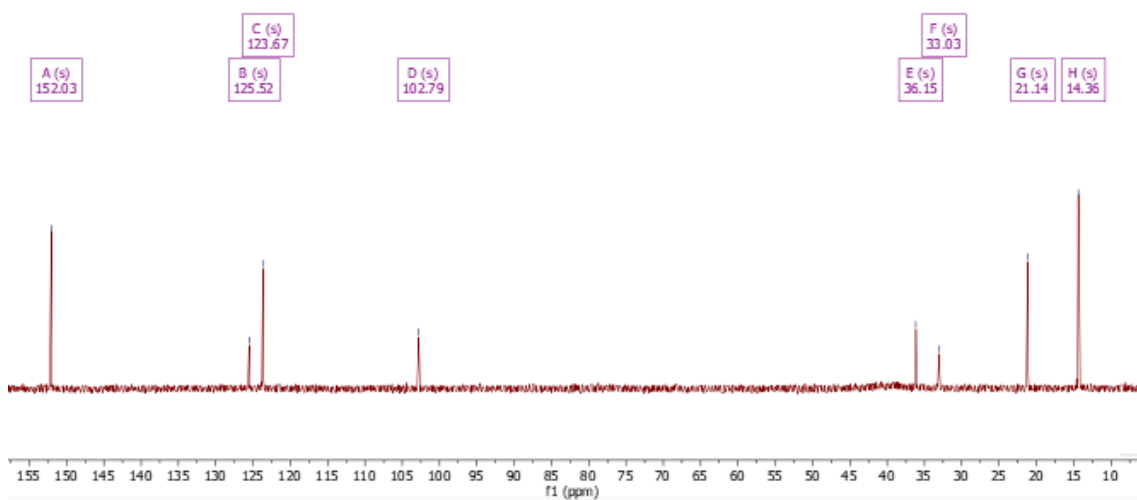

**Figure S7.**  $^{13}\text{C}$ -NMR spectrum (400 MHz,  $\text{DMSO}-d_6$ , 293 K) of compound **2**

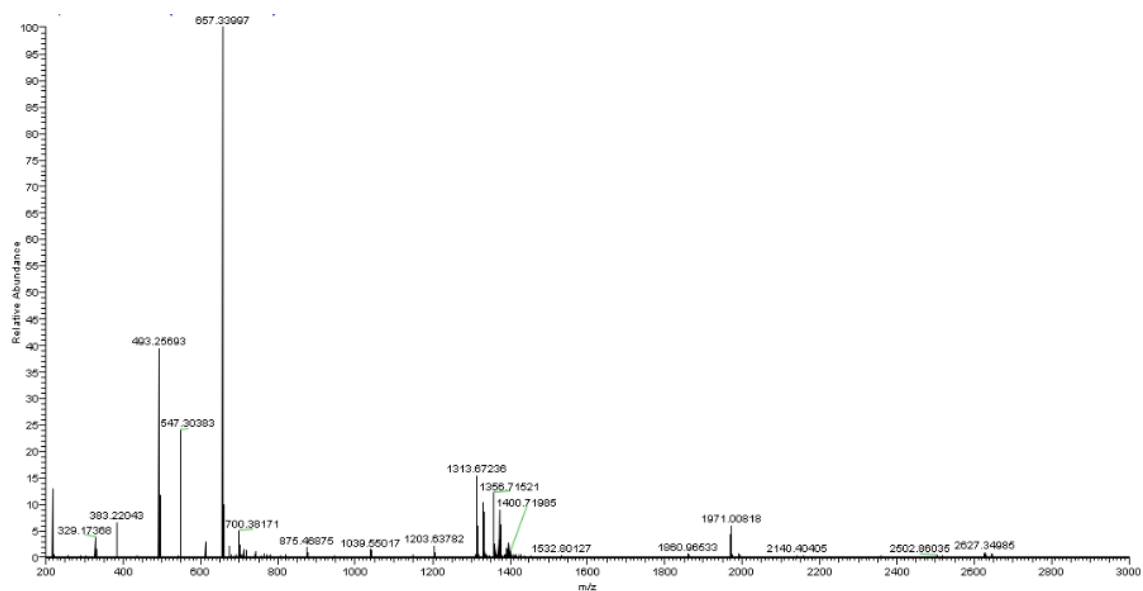

Figure S8. MS spectrum of compound 2

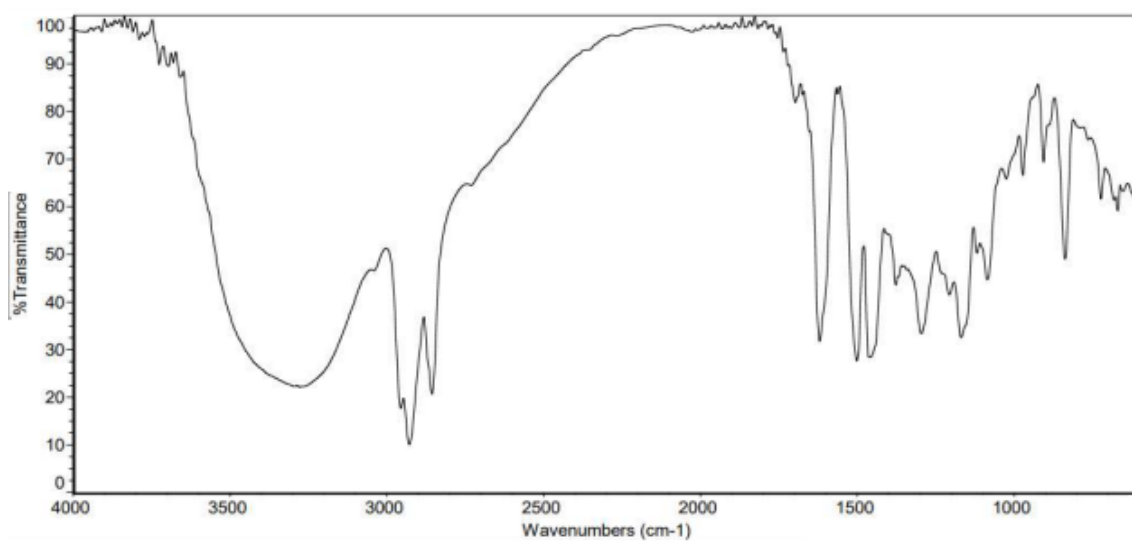

Figure S9. FT-IR spectrum of compound 3

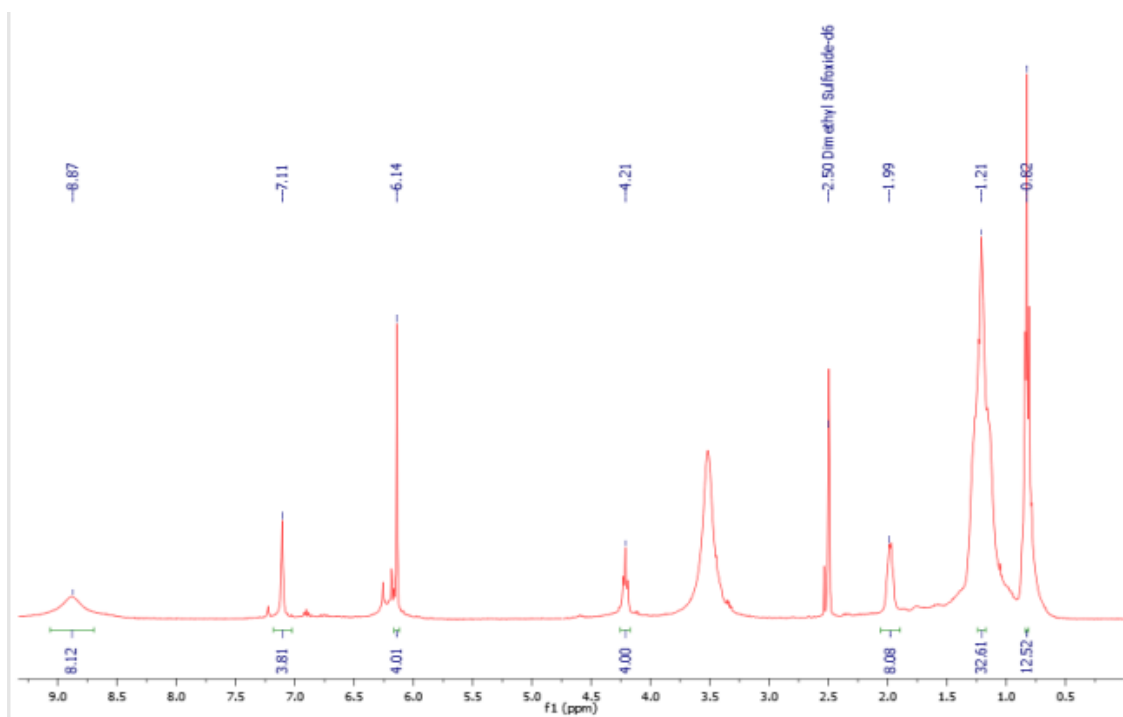

Figure S10. <sup>1</sup>H-NMR spectrum (400 MHz, DMSO-*d*<sub>6</sub>, 293 K) of compound 3

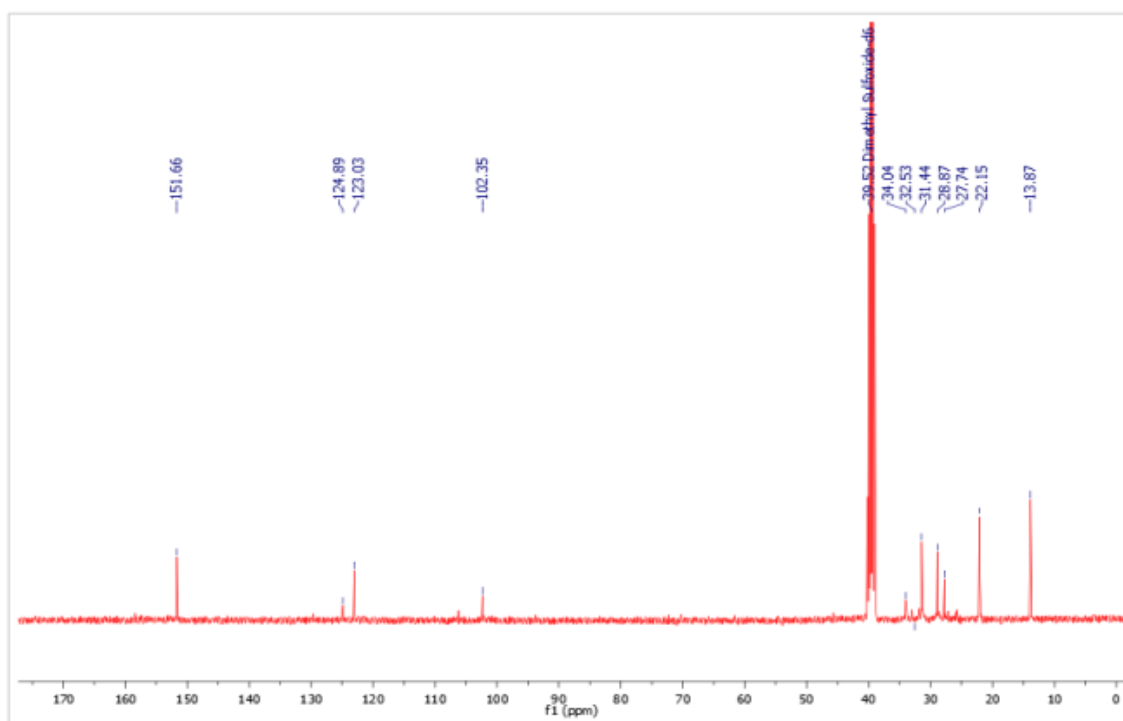

Figure S11. <sup>13</sup>C-NMR spectrum (400 MHz, DMSO-*d*<sub>6</sub>, 293 K) of compound 3

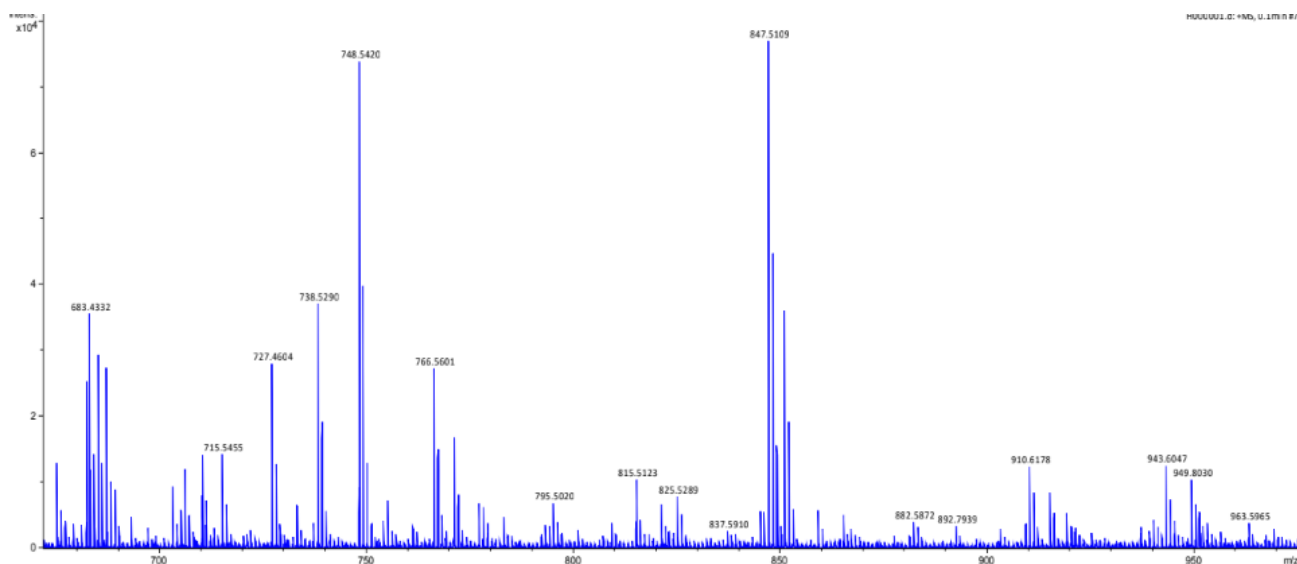

Figure S12. MS spectrum of compound 3

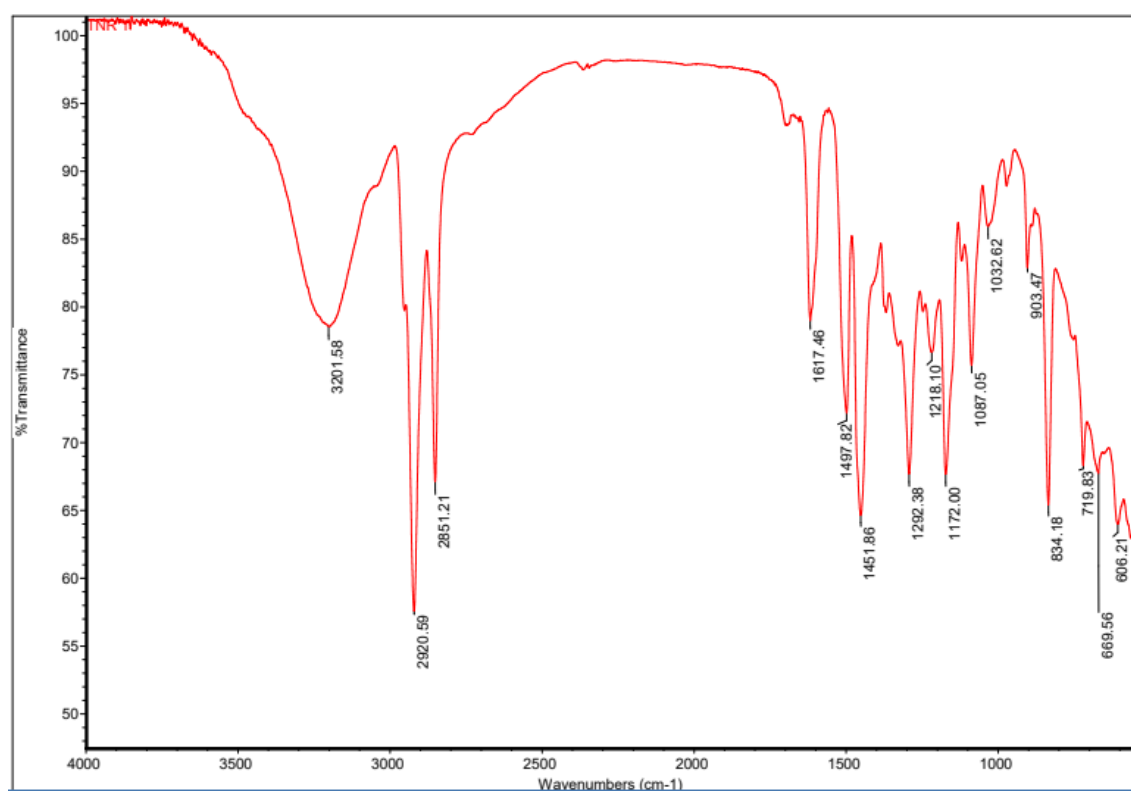

Figure S13. FT-IR spectrum of compound 4



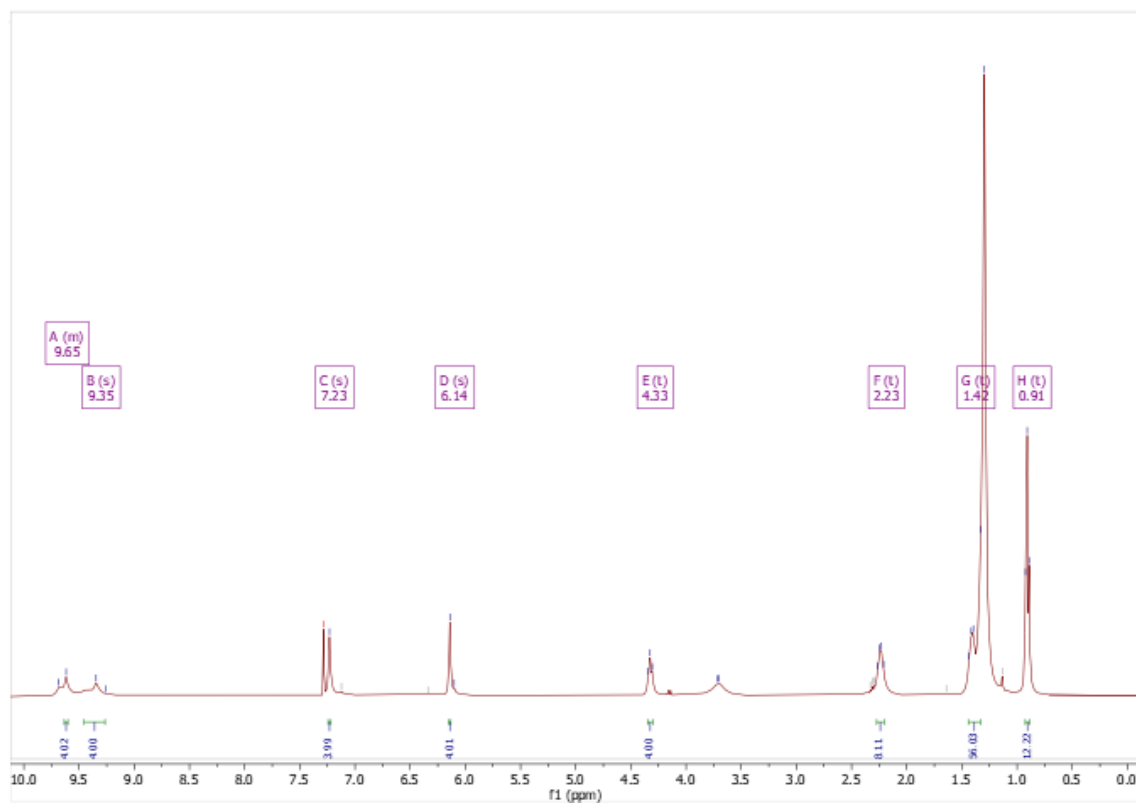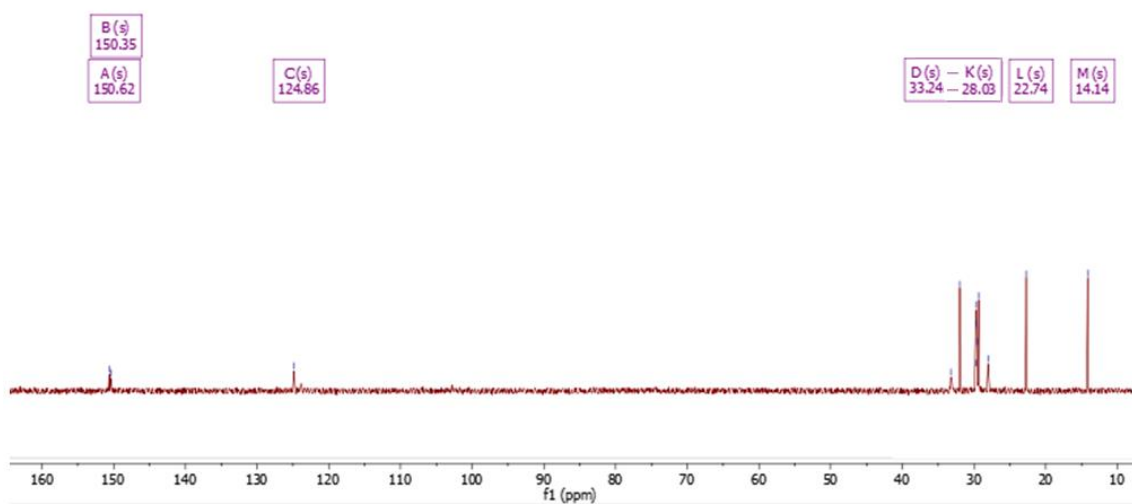

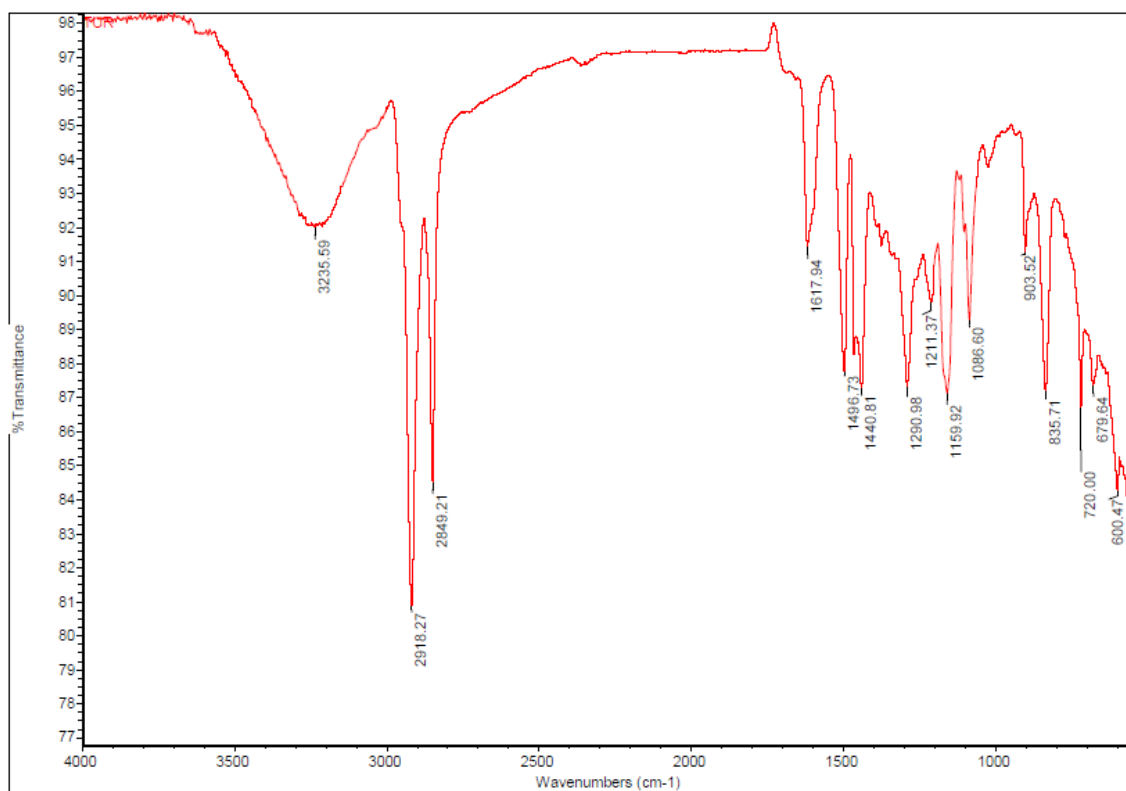

**Figure S16.** FT-IR spectrum of compound **5**

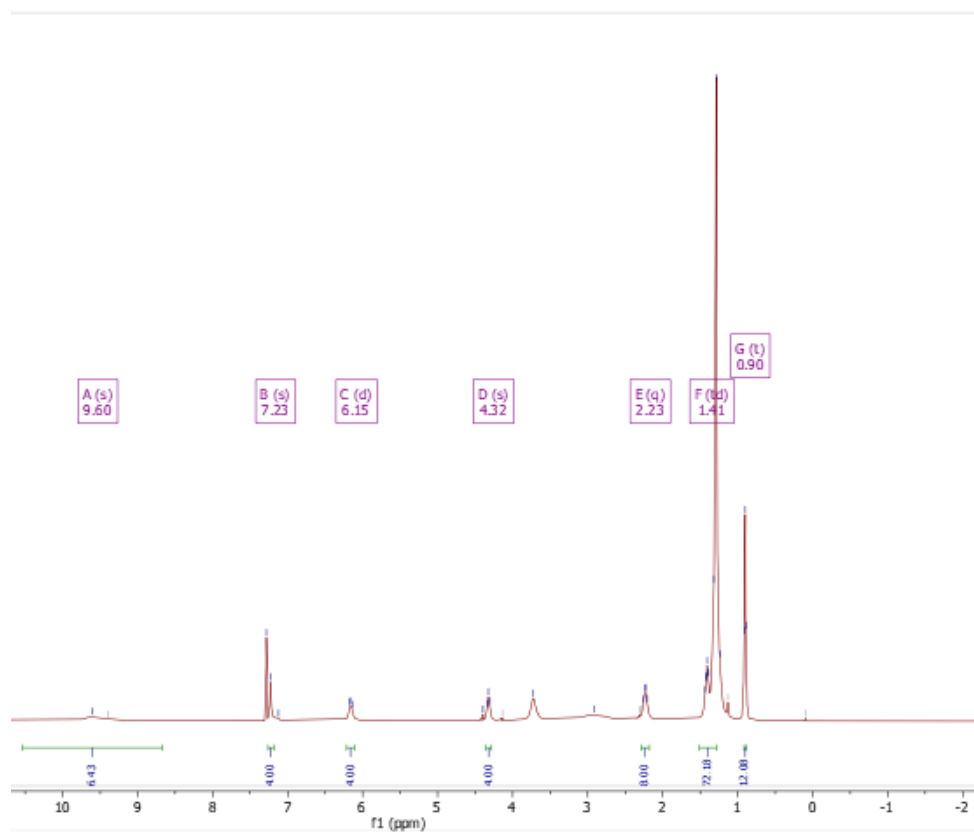

**Figure S17.** <sup>1</sup>H-NMR spectrum (400 MHz, CDCl<sub>3</sub>-d<sub>1</sub>, 293 K) of compound **5**

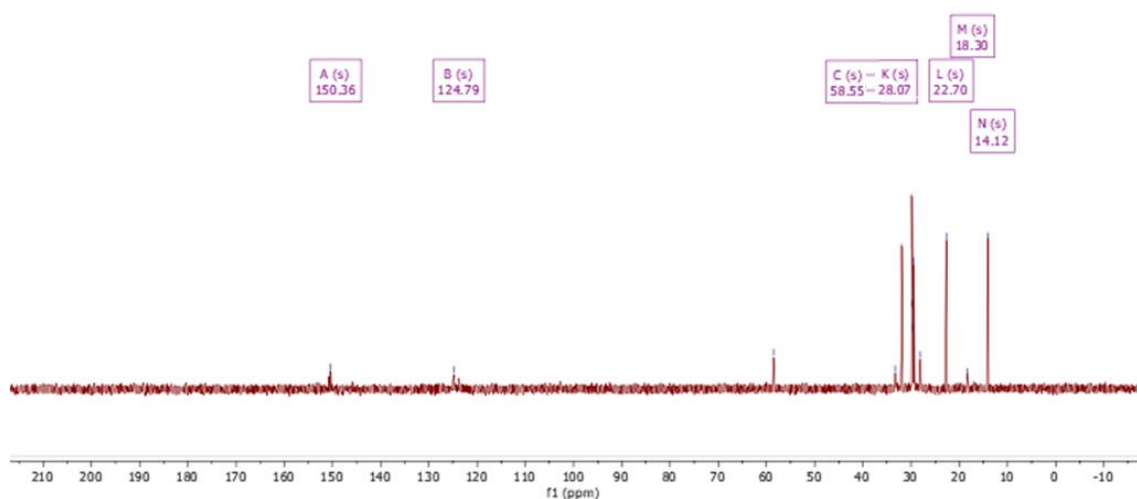

Figure S18.  $^{13}\text{C}$ -NMR spectrum (400 MHz,  $\text{CDCl}_3\text{-}d_1$ , 293 K) of compound 5

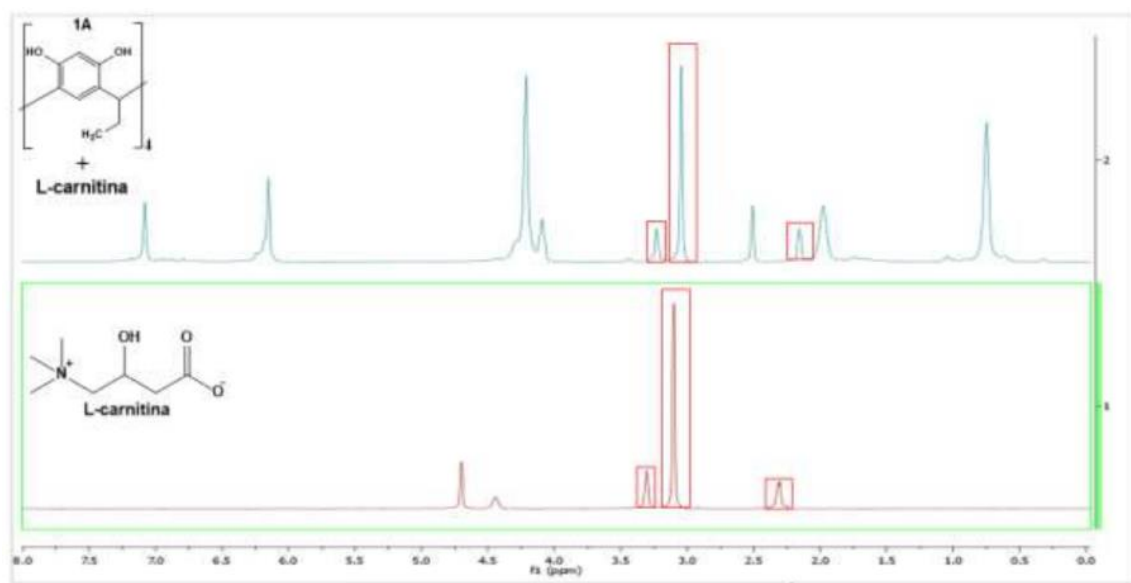

Figure S19.  $^1\text{H}$ -NMR spectrum (400 MHz,  $\text{DMSO-}d_6$ , 293 K) of complex 1

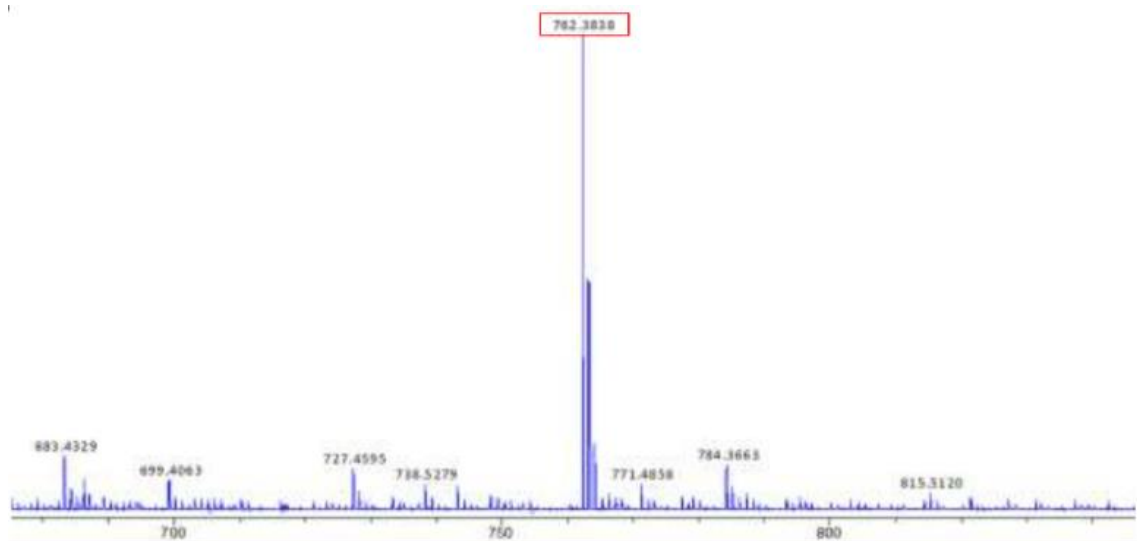

Figure S20. MS spectrum of complex 1

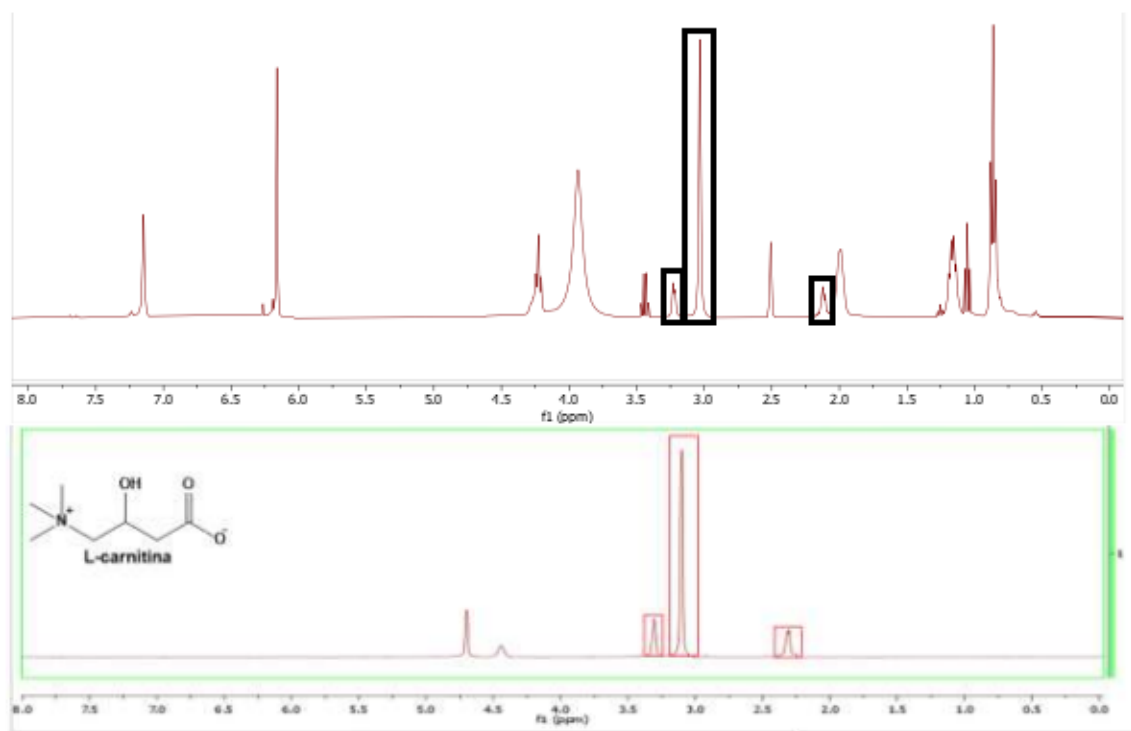

Figure S21.  $^1\text{H}$ -NMR spectrum (400 MHz,  $\text{DMSO}-d_6$ , 293 K) of complex 2

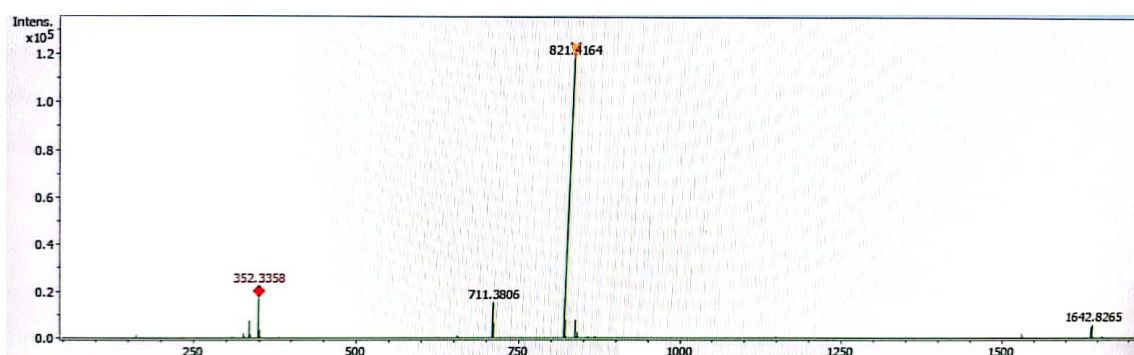

Figure S22. MS spectrum of complex 2

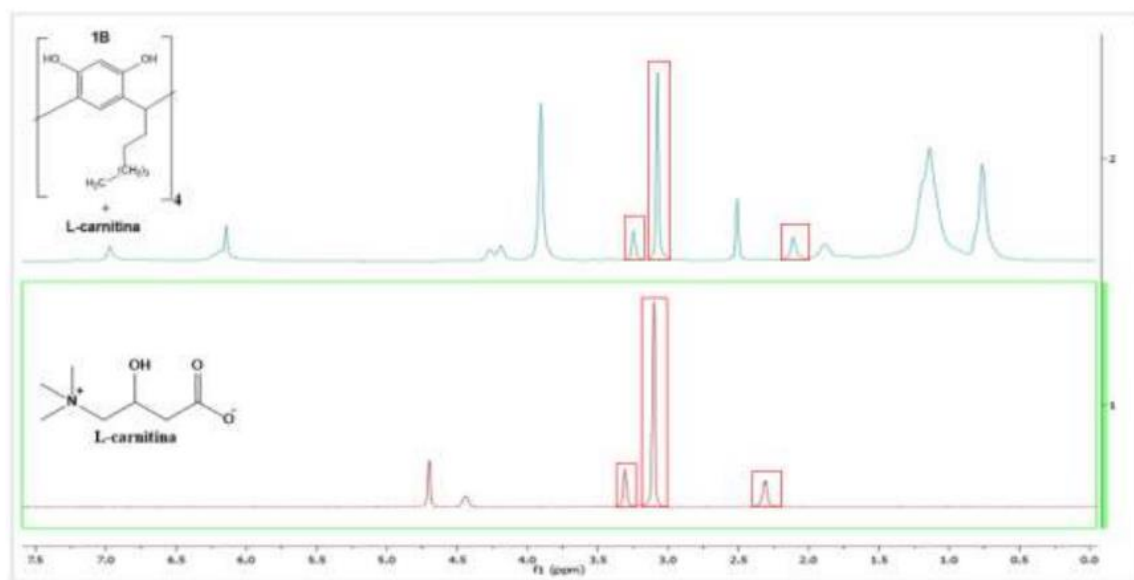

Figure S23.  $^1\text{H}$ -NMR spectrum (400 MHz,  $\text{DMSO}-d_6$ , 293 K) of complex 3

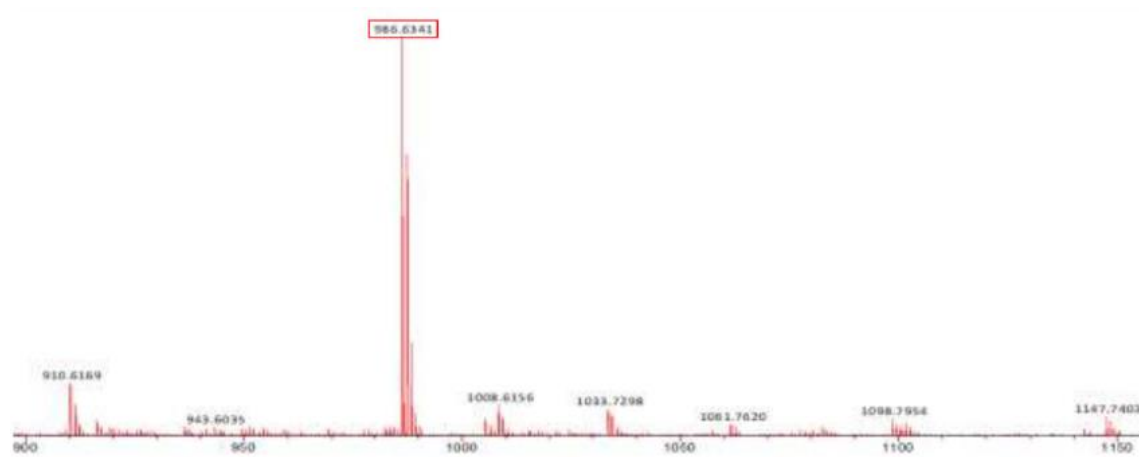

**Figure S24.** MS spectrum of complex **3**
